# Supplementary material
Source: PubMed Central journal article supplement (PMC534719)

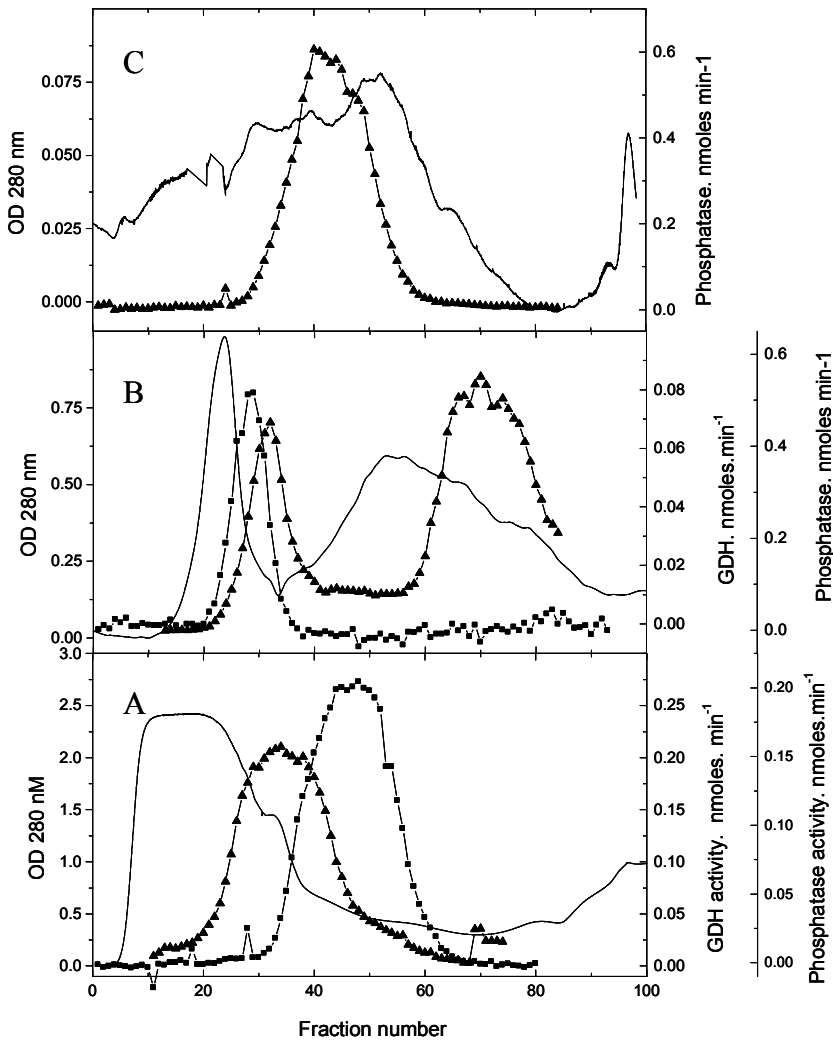

Supplement: pnas_101_48_16976__1.pdf [file pnas_101_48_16976__1.pdf]

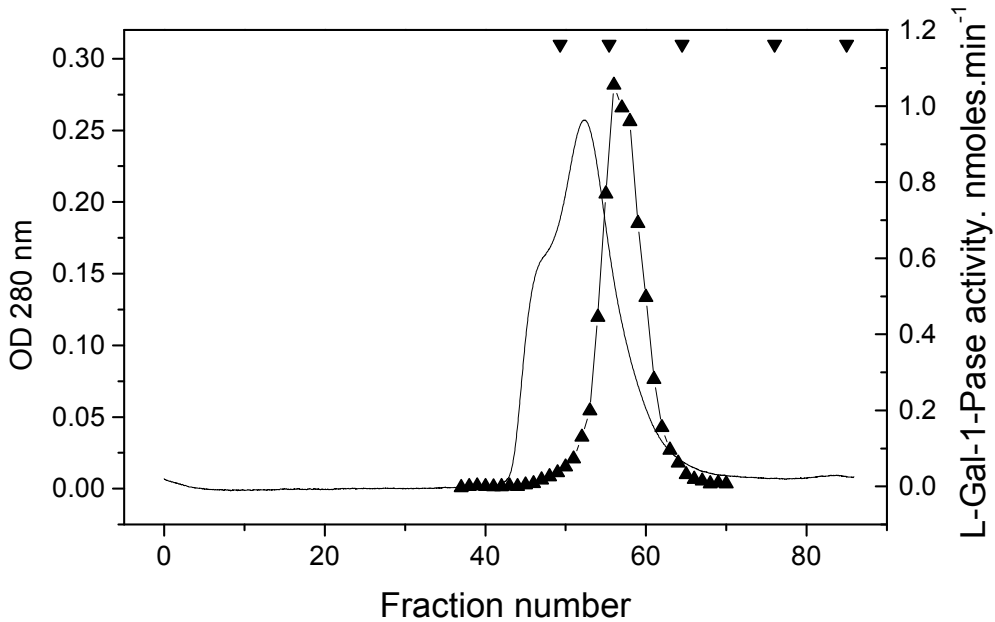

Supplement: pnas_101_48_16976__2.pdf [file pnas_101_48_16976__2.pdf]
